# Supplementary material for: Gene Expression Clustering and Selected Head and Neck Cancer Gene Signatures Highlight Risk Probability Differences in Oral Premalignant Lesions
Source: Cells. 2020 Aug 3;9(8):1828. doi: 10.3390/cells9081828 (PMC7466020; doi:10.3390/cells9081828)
Supplement: Supplementary file 1 [file cells-09-01828-s001.zip]

Archive with 4 entries (4 files):
- Figures/Figure1.pdf
- Figures/Figure2.pdf
- Figures/Figure3.pdf
- Figures/Figure4.pdf
